# Supplementary material
Source: publisher site journal article supplement (https://www.dovepress.com/article/207693)
Supplement: Supplementary file 1 [file get_supplementary_file.php]

## Appendix 1: Prediction scale

### Chinese and western medicine medication adherence scale for patients with chronic kidney disease

Completion time: \_\_\_\_\_ Name: \_\_\_\_\_ Date: \_\_\_\_\_

1. Do you know the therapeutic effect of each drug you are taking?  
a. know clearly   b. know mostly   c. know basically   d. know a bit   e. know nothing
2. Do you know the side effects of each drug you are taking?  
a. know clearly   b. know mostly   c. know basically   d. know a bit   e. know nothing
3. Do you know the name of the medicine you are taking?  
a. know clearly   b. know mostly   c. know basically   d. know a bit   e. know nothing
4. Do you know how to use the medicine you are taking?  
a. know clearly   b. know mostly   c. know basically   d. know a bit   e. know nothing
5. Do you understand the interactions among the drugs that you are taking?  
a. know clearly   b. know mostly   c. know basically   d. know a bit   e. know nothing
6. Do you know what utensils should be used for Chinese medicine decoction?  
a. know clearly   b. know mostly   c. know basically   d. know a bit   e. know nothing

nothing

7. Do you know the yield of water in Chinese medicine decoction?

a. know clearly b. know mostly c. know basically d. know a bit e. know

nothing

8. Do you know the soak of prepared slice of herbal drugs before decocting?

a. know clearly b. know mostly c. know basically d. know a bit e. know

nothing

9. Do you know decoction times of traditional Chinese medicine ?

a. know clearly b. know mostly c. know basically d. know a bit e. know

nothing

10. Do you know the cooking temperature of Chinese medicine decoction?

a. know clearly b. know mostly c. know basically d. know a bit e. know

nothing

11. Do you know the decoction time of traditional Chinese medicine?

a. know clearly b. know mostly c. know basically d. know a bit e. know

nothing

12. Do you know the following situations that require special handling in the decoction process of traditional Chinese medicine

(including be decocted first, be decocted later, wrap-boiling, melting, be decocted alone, and infusion)?

a. know clearly b. know mostly c. know basically d. know a bit e. know

nothing

13. Do you know the best temperature for taking traditional Chinese medicine?

a. know clearly   b. know mostly   c. know basically   d. know a bit   e. know nothing

14. Do you know the best time to take traditional Chinese medicine?

a. know clearly   b. know mostly   c. know basically   d. know a bit   e. know nothing

15. Do you know the dosage of traditional Chinese medicine?

a. know clearly   b. know mostly   c. know basically   d. know a bit   e. know nothing

16. Do you know the dietary contraindications during taking Chinese medicine?

a. know clearly   b. know mostly   c. know basically   d. know a bit   e. know nothing

17. I think if I take medicine, it will reduce the probability of hospitalization?

a. disagree totally   b. disagree   c. uncertain   d. agree   e. agree strongly

18. I think the medication makes me feel better?

a. disagree totally   b. disagree   c. uncertain   d. agree   e. strongly agree

19. I think taking drugs will improve my quality of life?

a. disagree totally   b. disagree   c. uncertain   d. agree   e. strongly agree

20. I think the taste of traditional Chinese medicine is acceptable?

a. disagree totally   b. disagree   c. uncertain   d. agree   e. strongly agree

21. I think there is no difficulty in decocting and taking Chinese medicine by oneself

for a long time?

a. disagree totally   b. disagree   c. uncertain   d. agree   e. strongly agree

22. In fact, I don't want to take medicine?

a. disagree totally   b. disagree   c. uncertain   d. agree   e. strongly agree

23. I think it is normal to have all kinds of side effects after having drugs?

a. disagree totally   b. disagree   c. uncertain   d. agree   e. strongly agree

24. I think it makes me hard to do anything else?

a. disagree totally   b. disagree   c. uncertain   d. agree   e. strongly agree

25. Have you ever forgotten to take your medicine in the past month?

a. never   b. occasionally   c. sometimes   d. often   e. all the time

26. Have you ever been careless about taking medicine in the past month?

a. never   b. occasionally   c. sometimes   d. often   e. all the time

27. Have you ever stopped taking medication in the past month when you felt your symptoms improved?

a. never   b. occasionally   c. sometimes   d. often   e. all the time

28. Have you ever stopped taking medication in the past month when you felt worse?

a. never   b. occasionally   c. sometimes   d. often   e. all the time

29. In the past month, have you often taken the same prescription for a long time according to the original prescription of traditional Chinese medicine?

a. never   b. occasionally   c. sometimes   d. often   e. all the time

30. Have you changed the dosage of traditional Chinese medicine in the past month?

a. never   b. occasionally   c. sometimes   d. often   e. all the time

31. Have you changed the prescription of traditional Chinese medicine by yourself in

the past month?

a. never   b. occasionally   c. sometimes   d. often   e. all the time
