# Supplementary material
Source: publisher site journal article supplement (https://www.dovepress.com/article/207693)
Supplement: Supplementary file 2 [file get_supplementary_file.php]

1 **Appendix 2: Measurement scale**

2 **Chinese and western medicine medication adherence scale for patients with**  
3 **chronic kidney disease**

4 Completion time: \_\_\_\_\_ person: \_\_\_\_\_ date: \_\_\_\_\_

5 **Knowledge Part**

6 **Basic knowledge of medicine**

7 1. Do you know the therapeutic effect of each drug you are taking?

8 a. know clearly b. know mostly c. know basically d. know a bit e. know nothing

9 2. Do you know the side effects of each drug you are taking?

10 a. know clearly b. know mostly c. know basically d. know a bit e. know nothing

11 3. Do you know the name of the medicine you are taking?

12 a. know clearly b. know mostly c. know basically d. know a bit e. know nothing

13 4. Do you know how to use the medicine you are taking?

14 a. know clearly b. know mostly c. know basically d. know a bit e. know nothing

15 5. Do you understand the interactions among the drugs that you are taking?

16 a. know clearly b. know mostly c. know basically d. know a bit e. know nothing

17

18 **Chinese medicine decoction knowledge**

19 6. Do you know what utensils should be used for Chinese medicine decoction?

20 a. know clearly b. know mostly c. know basically d. know a bit e. know nothing

- 1 7. Do you know the yield of water in Chinese medicine decoction?
- 2 a. know clearly b. know mostly c. know basically d. know a bit e. know nothing
- 3 8. Do you know the soak of prepared slice of herbal drugs before decocting?
- 4 a. know clearly b. know mostly c. know basically d. know a bit e. know nothing
- 5 9. Do you know decoction times of traditional Chinese medicine ?
- 6 a. know clearly b. know mostly c. know basically d. know a bit e. know nothing
- 7 10. Do you know the cooking temperature of Chinese medicine decoction?
- 8 a. know clearly b. know mostly c. know basically d. know a bit e. know nothing
- 9 11. Do you know the decoction time of traditional Chinese medicine?
- 10 a. know clearly b. know mostly c. know basically d. know a bit e. know nothing
- 11 12. Do you know the following situations that require special handling in the decoction
- 12 process of traditional Chinese medicine
- 13 (including be decocted first, be decocted later, wrap-boiling, melting, be decocted
- 14 alone, and infusion)?
- 15 a. know clearly b. know mostly c. know basically d. know a bit e. know nothing
- 16

17 **Knowledge of traditional Chinese medicine**

- 18 13. Do you know the best temperature for taking traditional Chinese medicine?
- 19 a. know clearly b. know mostly c. know basically d. know a bit e. know nothing
- 20 14. Do you know the best time to take traditional Chinese medicine?
- 21 a. know clearly b. know mostly c. know basically d. know a bit e. know nothing

1 15. Do you know the dosage of traditional Chinese medicine?  
2 a. know clearly b. know mostly c. know basically d. know a bit e. know nothing

3 16. Do you know the dietary contraindications during taking Chinese medicine?  
4 a. know clearly b. know mostly c. know basically d. know a bit e. know nothing

5 **Belief Part**

6 Medication belief

7 17.I think taking drugs will improve my quality of life?  
8 a. disagree totally b. disagree c. uncertain d. agree e. strongly agree

9 18.I think the taste of traditional Chinese medicine is acceptable?  
10 a. disagree totally b. disagree c. uncertain d. agree e. strongly agree

11 19. I think there is no difficulty in decocting and taking Chinese medicine by oneself for  
12 a long time?

13 a. disagree totally b. disagree c. uncertain d. agree e. strongly agree  
14 20.I think it is normal to have all kinds of side effects after having drugs?

15 a. disagree totally b. disagree c. uncertain d. agree e. strongly agree  
16 21.I think it makes me hard to do anything else?

17 a. disagree totally b. disagree c. uncertain d. agree e. strongly agree  
18

19 **Behavior Part**

20 Taking medicine

21 22.Have you ever forgotten to take your medicine in the past month?

1 a. never b. occasionally c. sometimes d. often e. all the time

2 23. Have you ever been careless about taking medicine in the past month?

3 a. never b. occasionally c. sometimes d. often e. all the time

4 24. Have you ever stopped taking medication in the past month when you felt your  
5 symptoms improved?

6 a. never b. occasionally c. sometimes d. often e. all the time

7 25. Have you ever stopped taking medication in the past month when you felt worse?

8 a. never b. occasionally c. sometimes d. often e. all the time

9 26. Have you changed the prescription of traditional Chinese medicine by yourself in  
10 the past month?

11 a. never b. occasionally c. sometimes d. often e. all the time
